# Supplementary material
Source: Springer Nature journal article supplement (https://www.springermedizin.de/resource/supplementary/12889_2012_4732_MOESM2_ESM.pdf/9493482)

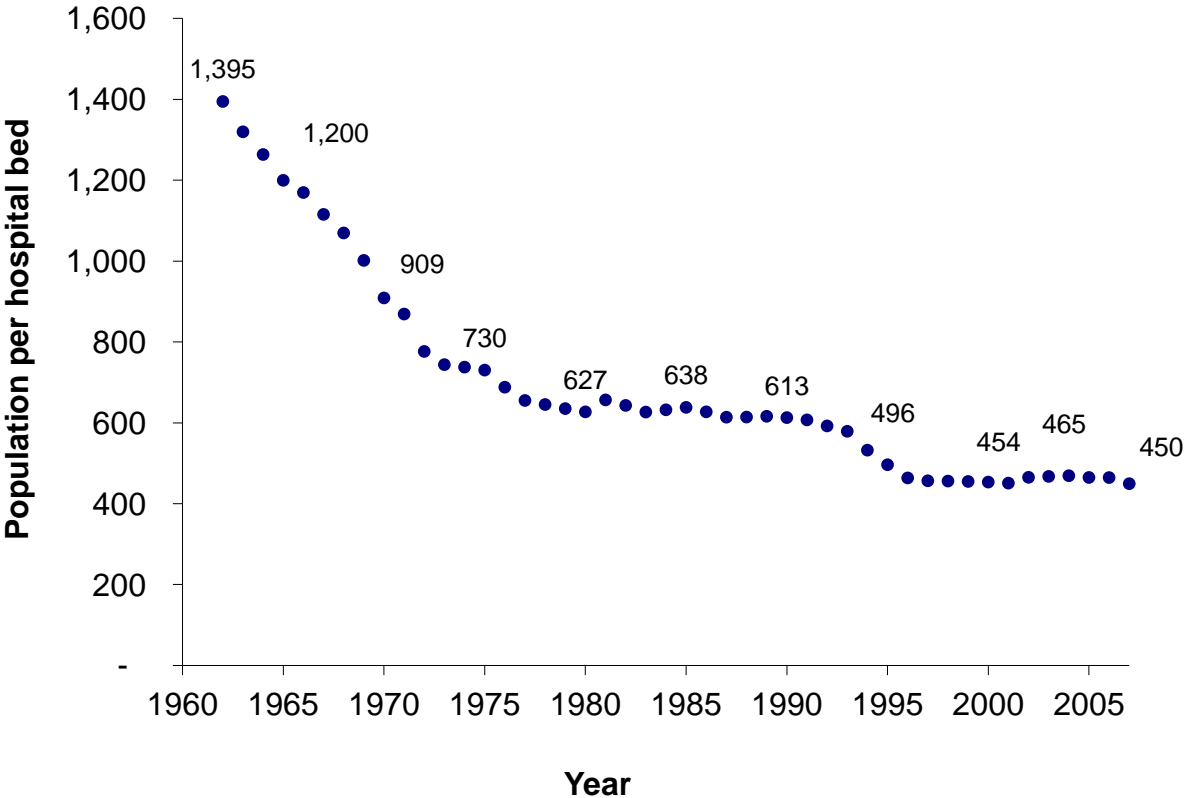

Supplement: MOESM2 [file 9493482]
